# Supplementary material for: Lanthanopolyoxotungstates in silica nanoparticles: multi-wavelength photoluminescent core/shell materials
Source: Royal Society of Chemistry journal article supplement (doi:10.1039/b919691a), 2010-01-01
Supplement: b919691a.pdf [file b919691a.pdf]

Supplementary material (ESI) for Journal of Materials Chemistry  
This journal is © The Royal Society of Chemistry 2010

## Electronic Supplementary Information

### **Lanthanopolyoxotungstates in silica nanoparticles: multi-wavelength photoluminescent core/shell materials**

Carlos M. Granadeiro,<sup>a</sup> Rute A. S. Ferreira,<sup>b</sup> Paula C. R. Soares-Santos,<sup>a</sup> Luís D. Carlos,<sup>b</sup> Tito Trindade<sup>a</sup> and Helena I. S. Nogueira\*<sup>a</sup>

<sup>a</sup> *Department of Chemistry, CICECO, University of Aveiro, 3810-193 Aveiro, Portugal. E-mail: [helenanogueira@ua.pt](mailto:helenanogueira@ua.pt)*

<sup>b</sup> *Department of Physics, CICECO, University of Aveiro, 3810-193 Aveiro, Portugal.*

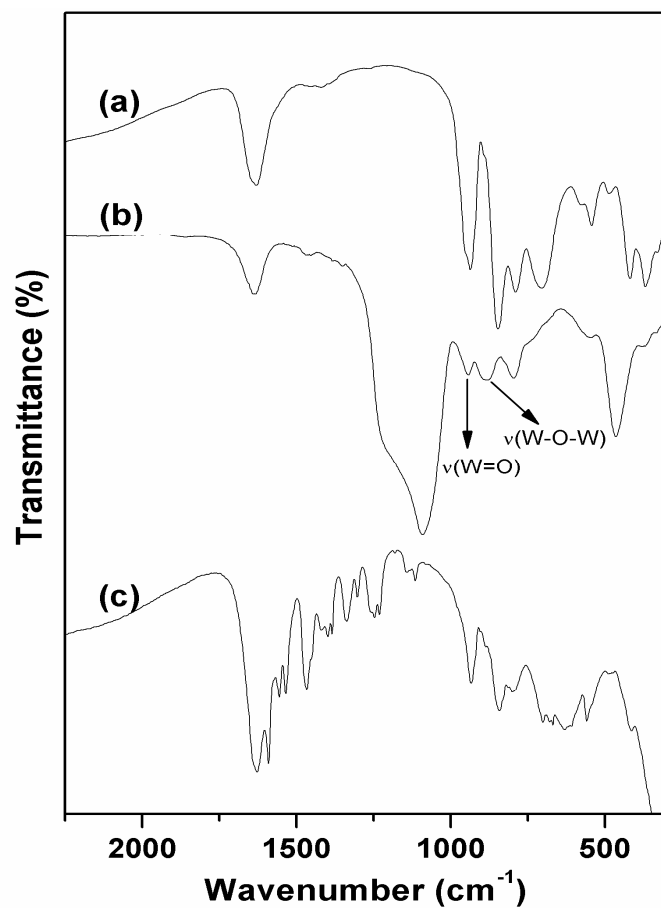

**Fig. S1** FT-IR spectra of (a)  $\text{Na}_9[\text{Eu}(\text{W}_5\text{O}_{18})_2] \cdot 14\text{H}_2\text{O}$ , (b)  $[\text{Eu}(\text{W}_5\text{O}_{18})_2]/\text{SiO}_2$  (**1**) and (c)  $\text{Na}_{13}[\text{Eu}(\text{W}_5\text{O}_{18})_2(\text{picOH})_4] \cdot 15\text{H}_2\text{O}$ .

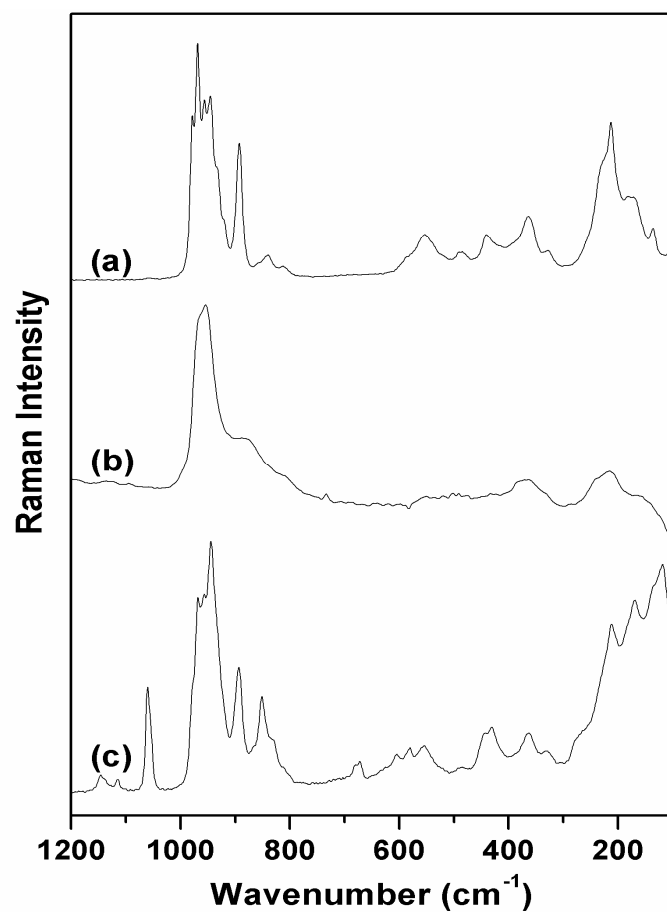

**Fig. S2** FT-Raman spectra of (a)  $\text{Na}_9[\text{Eu}(\text{W}_5\text{O}_{18})_2] \cdot 14\text{H}_2\text{O}$ , (b)  $[\text{Eu}(\text{W}_5\text{O}_{18})_2]/\text{SiO}_2$  (**1**) and (c)  $\text{Na}_{13}[\text{Eu}(\text{W}_5\text{O}_{18})_2(\text{picOH})_4] \cdot 15\text{H}_2\text{O}$ .

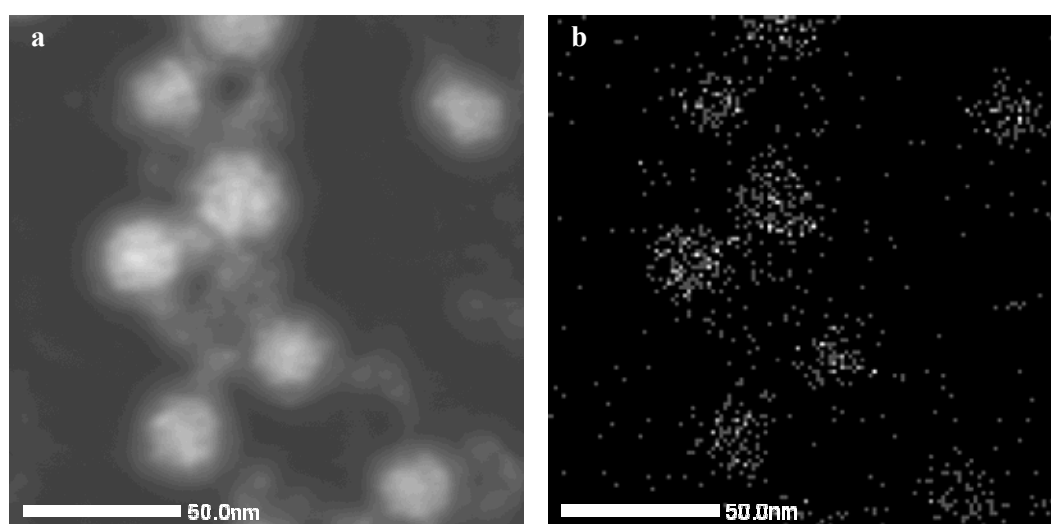

**Fig. S3** HRTEM image of  $[\text{Tb}(\text{W}_5\text{O}_{18})_2]/\text{SiO}_2$  (**2**) nanocomposite in dark field mode (a) and separated EDX mapping for Tb (b).

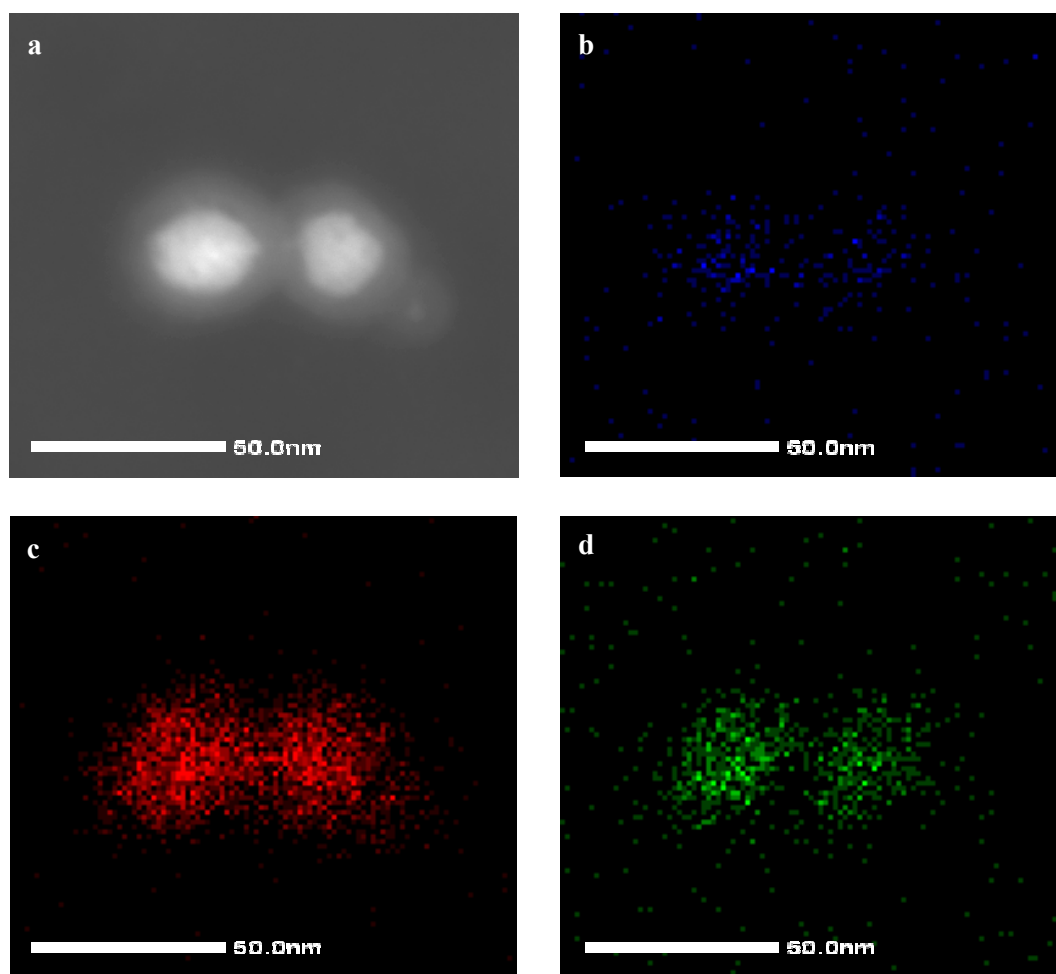

**Fig. S4** HRTEM image of [Gd(W<sub>5</sub>O<sub>18</sub>)<sub>2</sub>]/SiO<sub>2</sub> (**3**) nanocomposite in dark field mode (a) and separated EDX mapping for Gd (b), Si (c) and W (d).

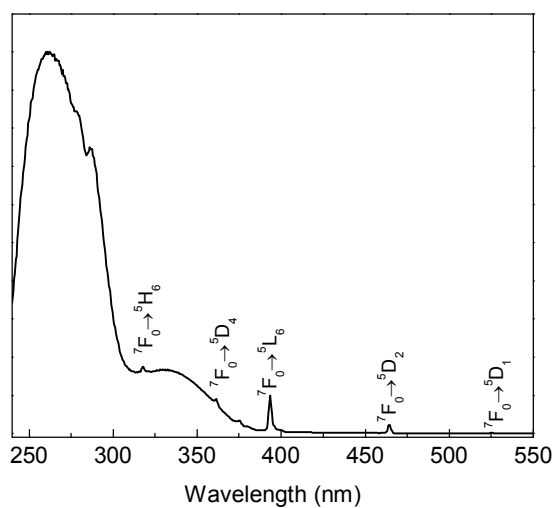

**Fig. S5** Low-temperature (12 K) excitation spectrum of [Eu(W<sub>5</sub>O<sub>18</sub>)<sub>2</sub>(picOH)<sub>4</sub>]/SiO<sub>2</sub> (**6**) monitored at 611 nm.

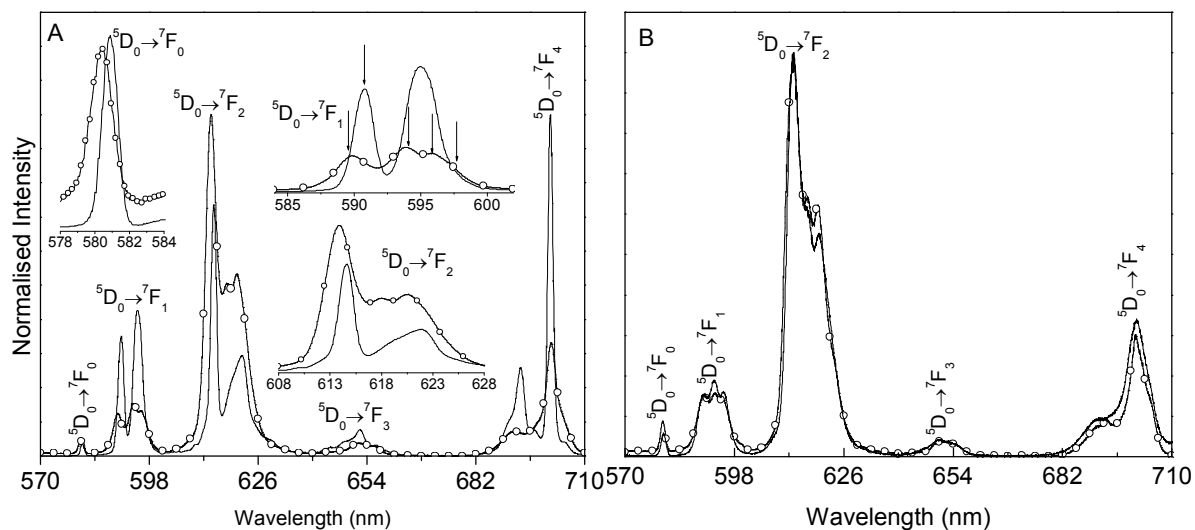

**Fig. S6** Emission (12 K) spectra of the A:  $[\text{Eu}(\text{W}_5\text{O}_{18})_2]/\text{SiO}_2$  (**1**) excited at 465 nm (solid line) and 330 nm (solid line and circles) and of the B:  $[\text{Eu}(\text{W}_5\text{O}_{18})_2(\text{picOH})_4]/\text{SiO}_2$  (**6**) excited at 395 nm (solid line) and 320 nm (solid line and circles).
